# Supplementary material
Source: Springer Nature journal article supplement (https://www.springermedizin.de/resource/supplementary/12960_2012_332_MOESM2_ESM.pdf/9569860)
Supplement: MOESM2 [file 9569860]

### Demand for Nurses

- Changing healthcare system policies
- Wider societal factors
  - epidemiological factors
  - demographic factors
  - socio-economic factors

## Private Nurse Production

### Policy Environment of Private Nurse Production

- Quality assurance for nursing graduates
- Accreditation of nursing institutes
- Support for public-private partnerships

### Nursing Supply

- Stock of nurses
- Number of nurses produced in the private sector
- Production capacity of private nurse education institutions
